# Supplementary material
Source: HighWire-hosted journal article supplement (https://www.cmajopen.ca/highwire/filestream/85469/field_highwire_adjunct_files/2/2020-0265-3-at.pdf)
Supplement: 2020-0265-3-at.pdf [file 2020-0265-3-at.pdf]

| <i>Appendix, Table 3. Distribution of health authority by gender.</i> |                        |                      |                              |
|-----------------------------------------------------------------------|------------------------|----------------------|------------------------------|
| <b>Health Authority</b>                                               | <b>Female (n=4701)</b> | <b>Male (n=2777)</b> | <b>Gender missing (n=37)</b> |
| <b>Fraser</b>                                                         | 1673 (35.6%)           | 1010 (36.4%)         | 5                            |
| <b>Interior</b>                                                       | 717 (15.3%)            | 455 (16.4%)          | 0                            |
| <b>Northern</b>                                                       | 281 (6%)               | 152 (5.5%)           | 2                            |
| <b>Vancouver Coastal</b>                                              | 1036 (22%)             | 609 (21.9%)          | 3                            |
| <b>Vancouver Island</b>                                               | 994 (21.1%)            | 551 (19.8%)          | 4                            |
| <i>Health authority missing (n=195)</i>                               | 113                    | 59                   | 23                           |
